# Supplementary material for: Direct observation of active material interactions in flowable electrodes using X-ray tomography
Source: Royal Society of Chemistry journal article supplement (doi:10.1039/c6fd00243a), 2017-01-01
Supplement: c6fd00243a1.pdf [file c6fd00243a1.pdf]

## Supplementary Figures

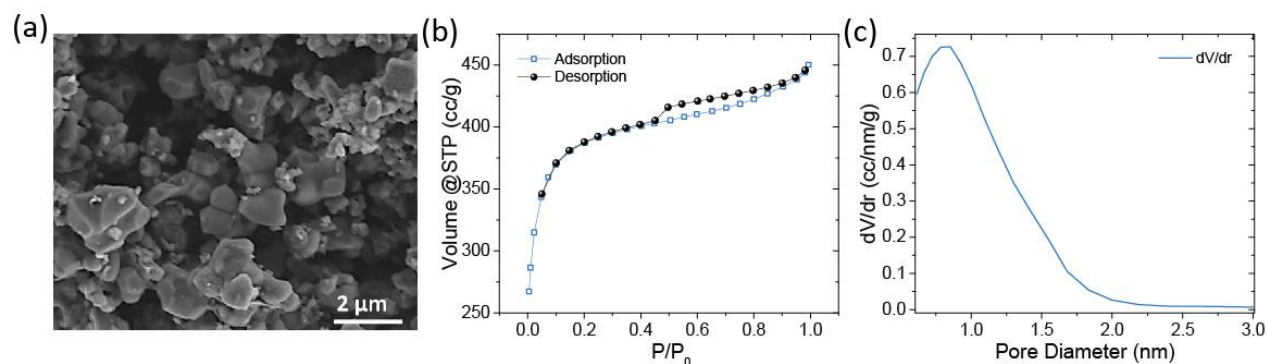

**Figure S1.** A SEM image of the anisometric activated carbon (YP-50 Kuraray) used in the suspension electrode (a). The material exhibits a type IV isotherm with a small hysteresis from gas sorption experiments (b) and is mainly microporous in nature with a small volume of mesopores >2 nm (c).

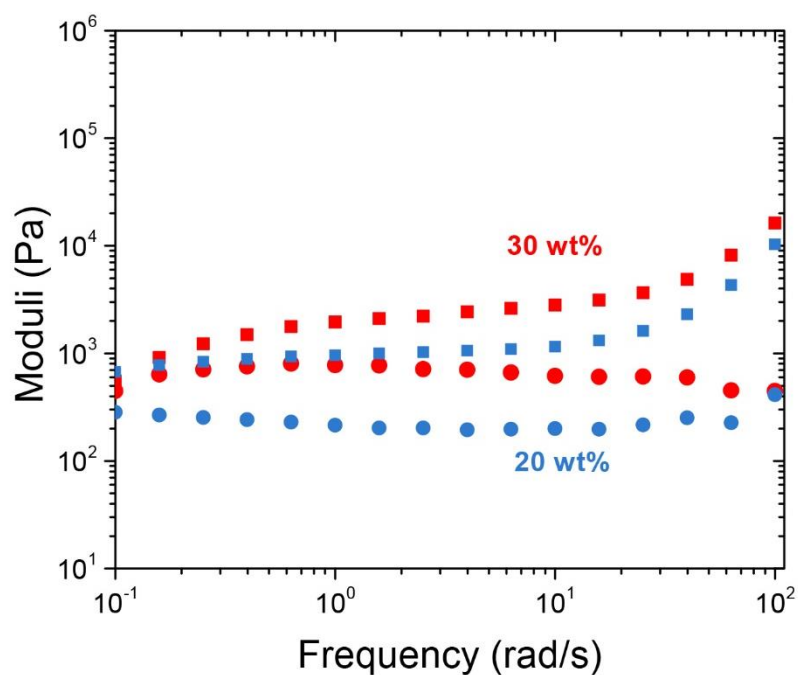

**Figure S2.** Rheology of carbon suspension electrodes in water (without the presence of a salt). The squares represent the elastic modulus and the circles represent the viscous modulus.

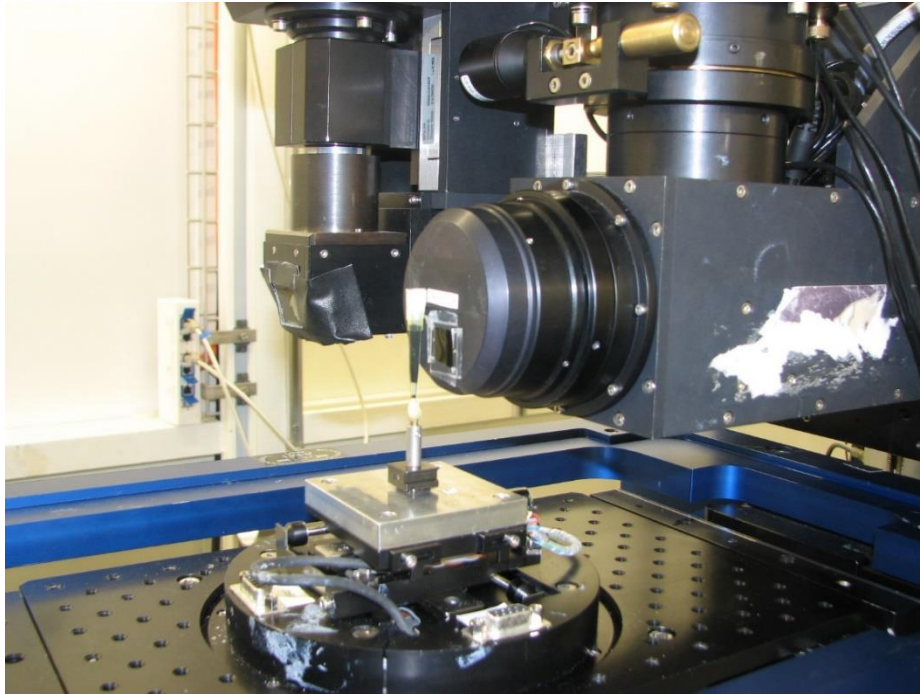

**Figure S3.** Photograph of the experimental set-up.
